# Supplementary material for: Epistatic interactions between at least three loci determine the “rat-tail” phenotype in cattle
Source: PubMed Central journal article supplement (PMC4818457; doi:10.1186/s12711-016-0199-8), 2016-03-31

## Hair structure (HS), scores 1 – 6

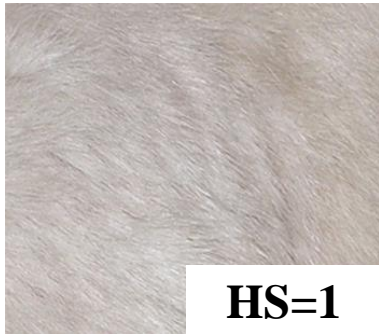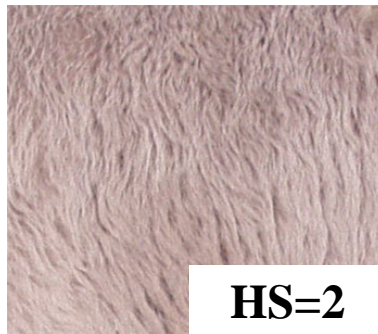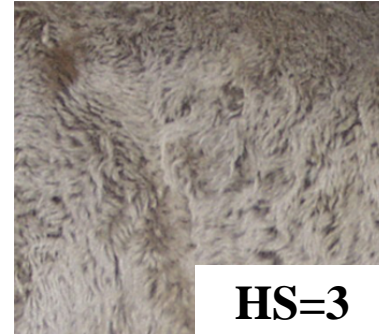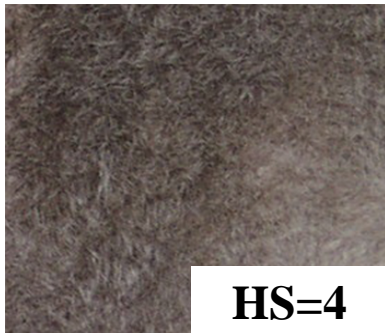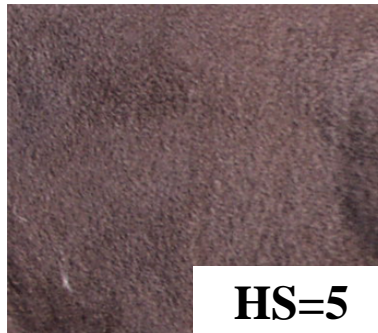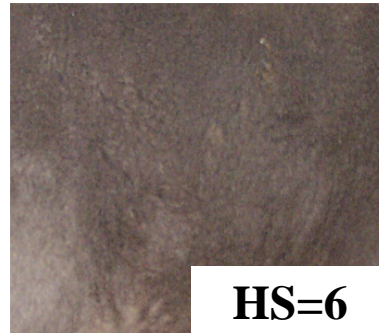

**Hair density (HD), scores 1 – 4**

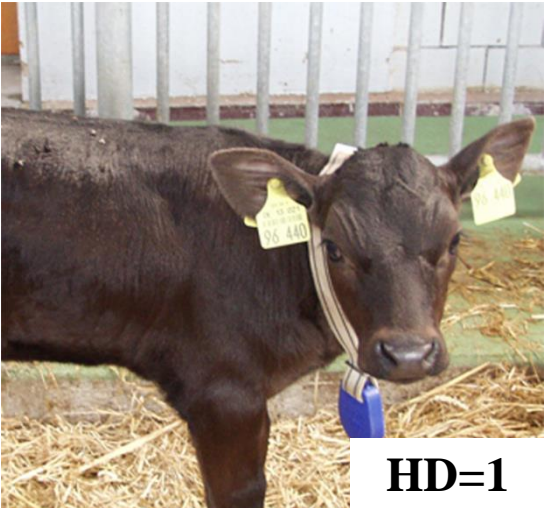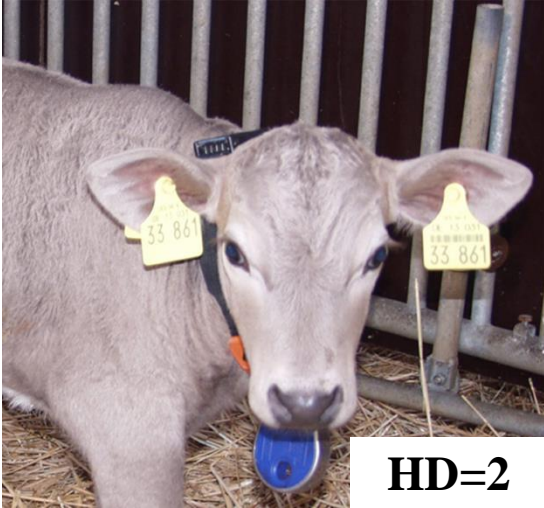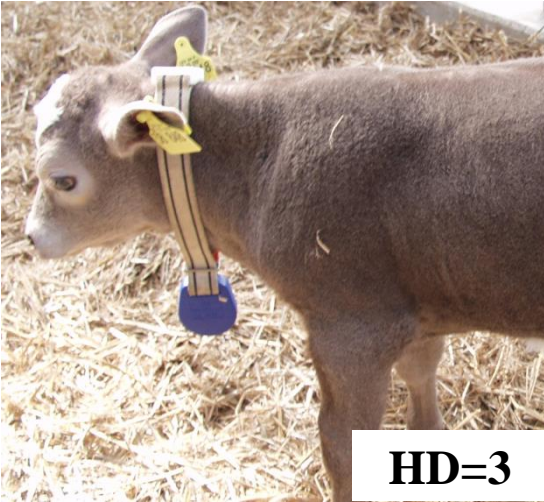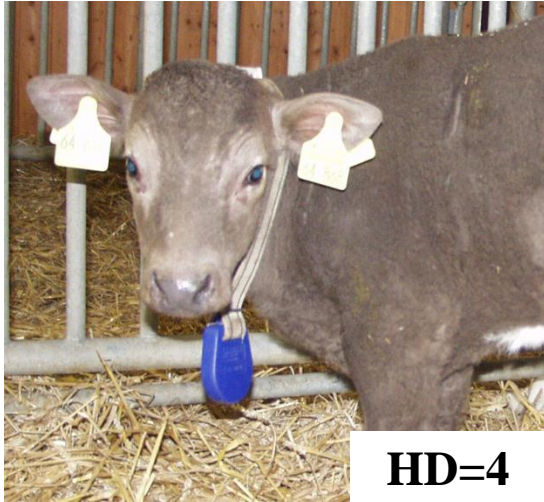

# Hair length variations (HLV), scores 1 – 4

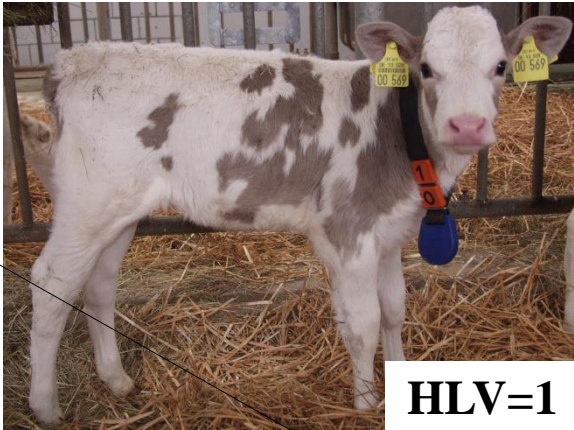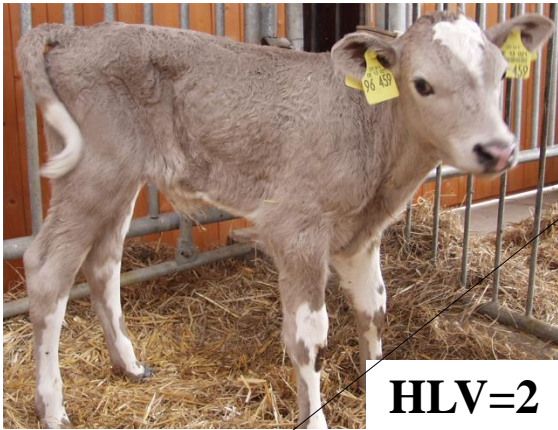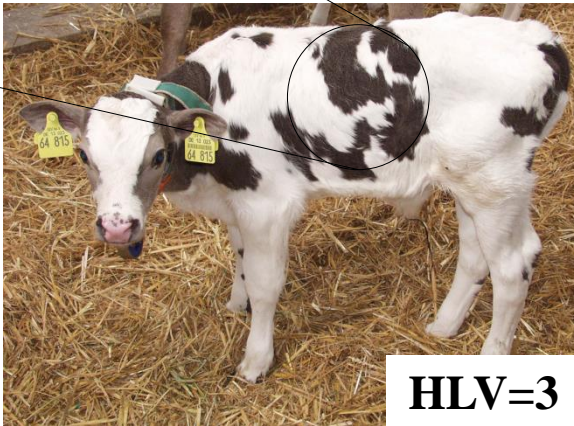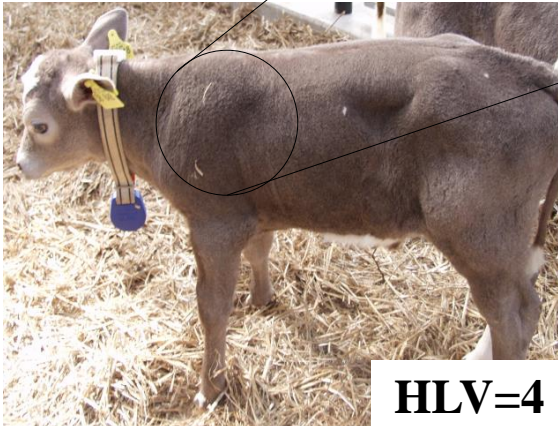

**Overall „rat-tail“ phenotype (RT), scores 1 – 4**

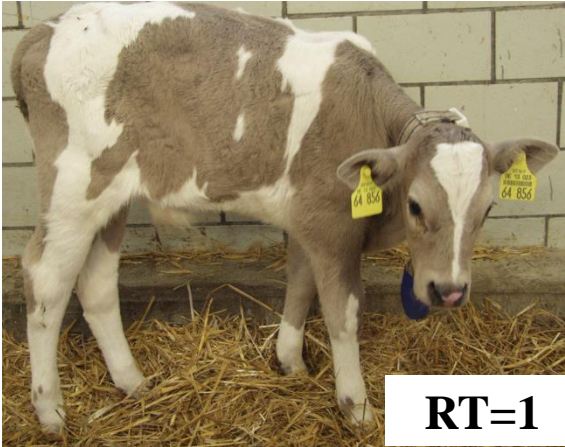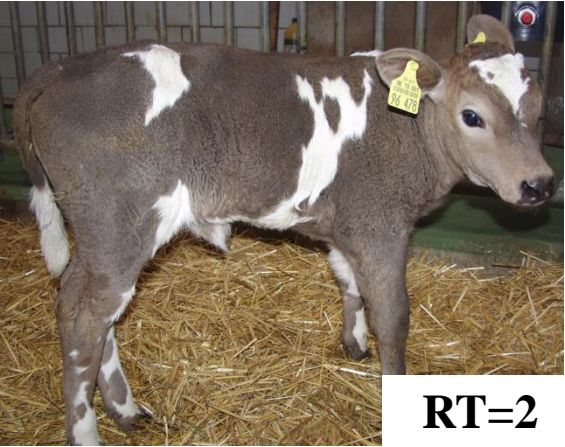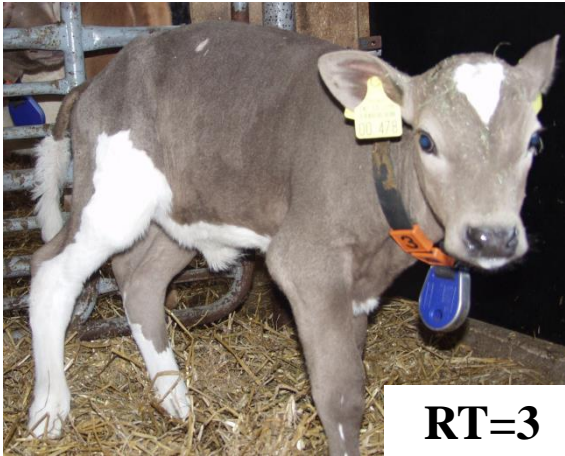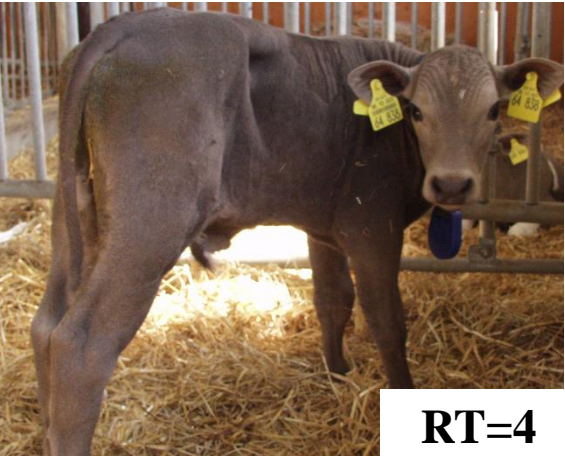

**Eumelanic coat colour dilution, scores 1 – 4**

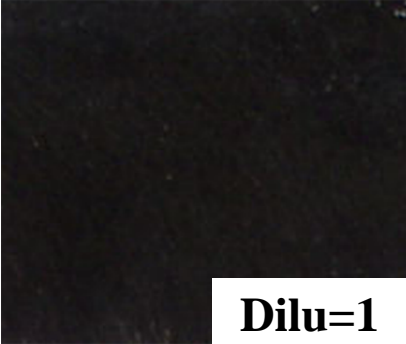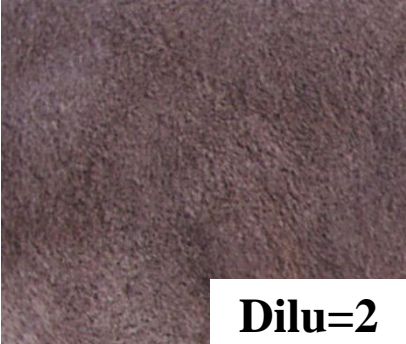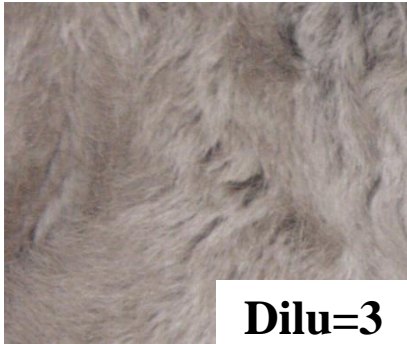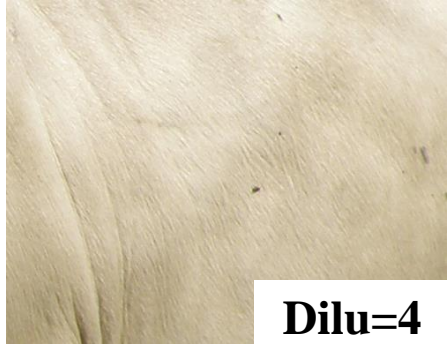

**Category 5 – pheomelanic coat colour dilution, scores 1 – 4**

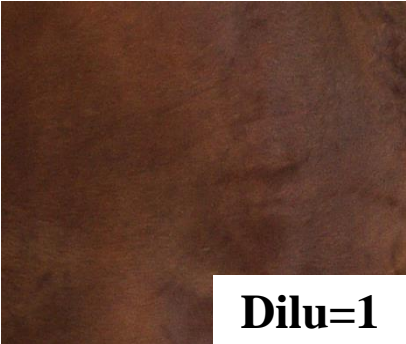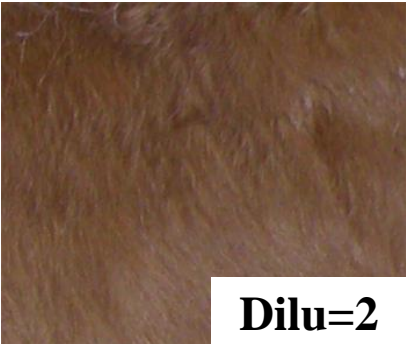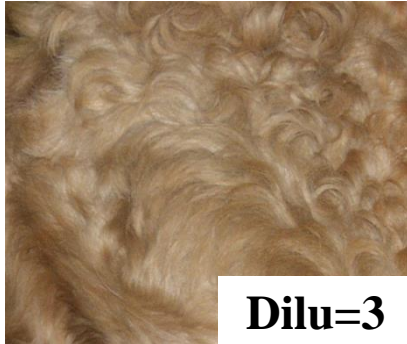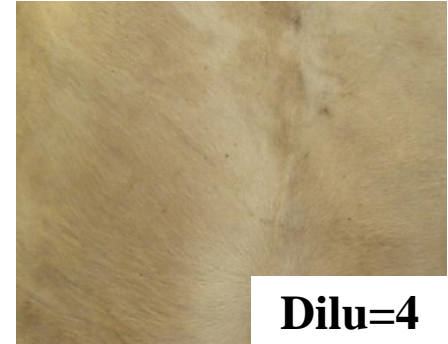

Supplement: 12711_2016_199_MOESM1_ESM.pdf [file 12711_2016_199_MOESM1_ESM.pdf]
