# Supplementary material for: Epistatic interactions between at least three loci determine the “rat-tail” phenotype in cattle
Source: PubMed Central journal article supplement (PMC4818457; doi:10.1186/s12711-016-0199-8), 2016-03-31

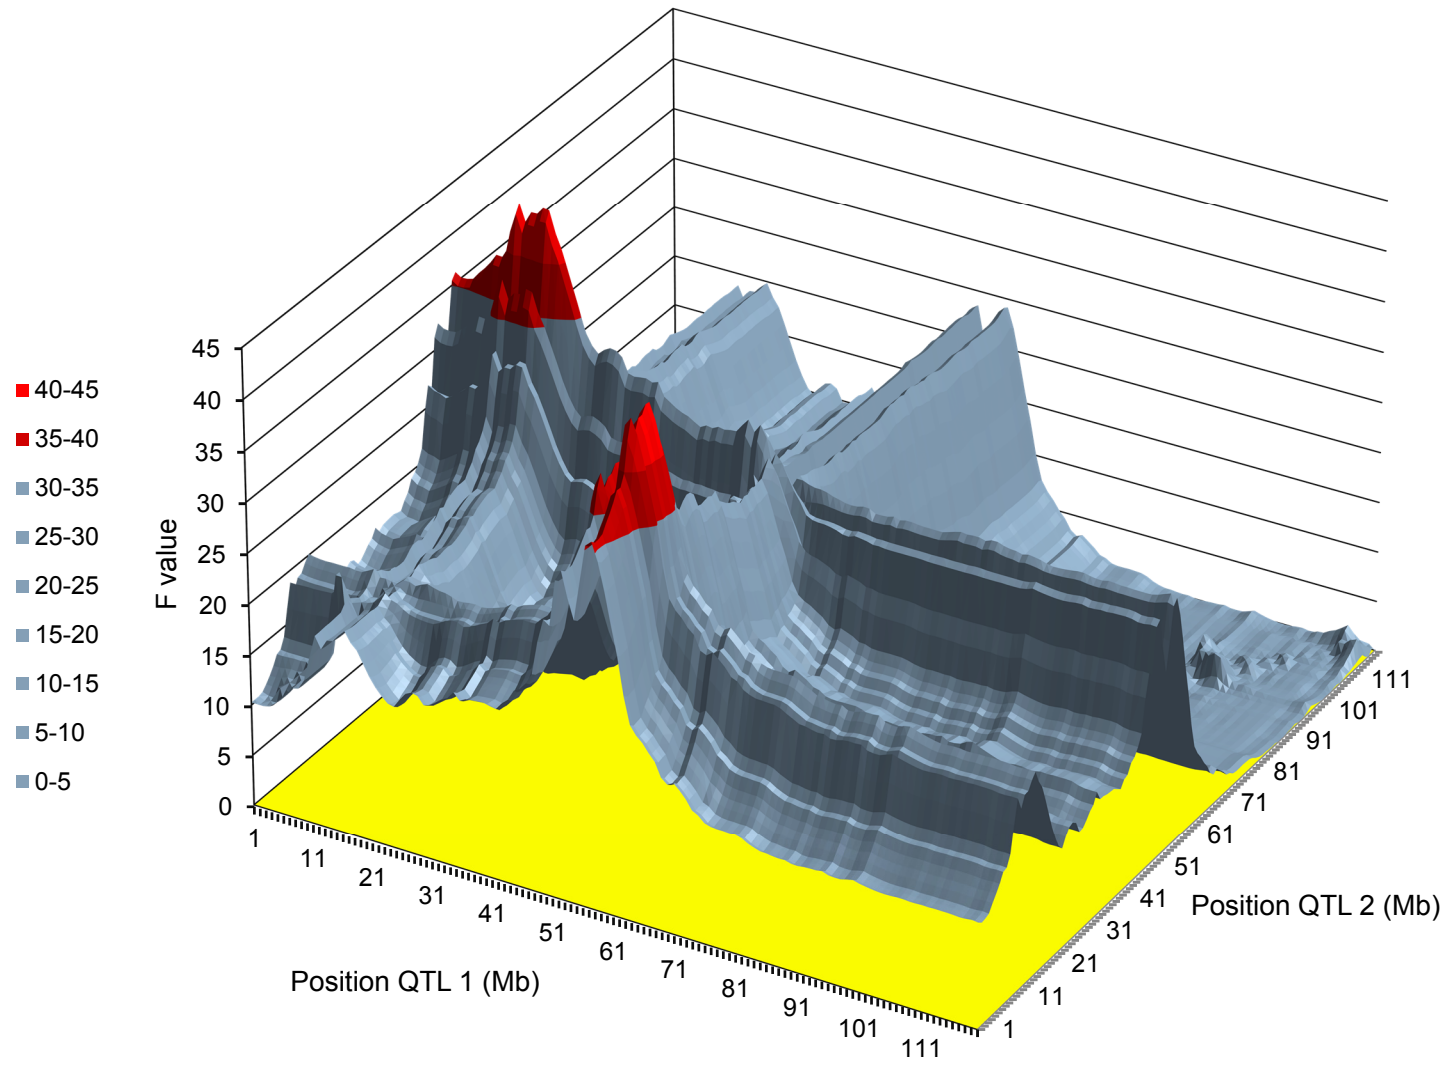

Supplement: 12711_2016_199_MOESM3_ESM.pdf [file 12711_2016_199_MOESM3_ESM.pdf]
