# Supplementary material for: Epistatic interactions between at least three loci determine the “rat-tail” phenotype in cattle
Source: PubMed Central journal article supplement (PMC4818457; doi:10.1186/s12711-016-0199-8), 2016-03-31

**A - Hair density (HD) MM**

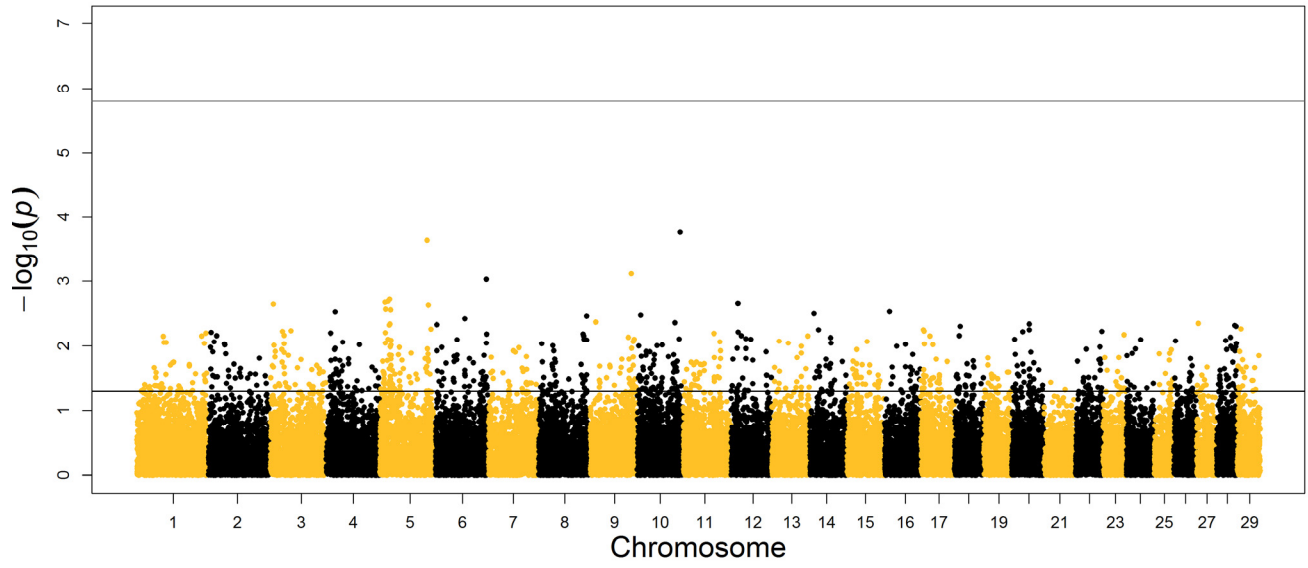

**B - Hair structure (HS) MM**

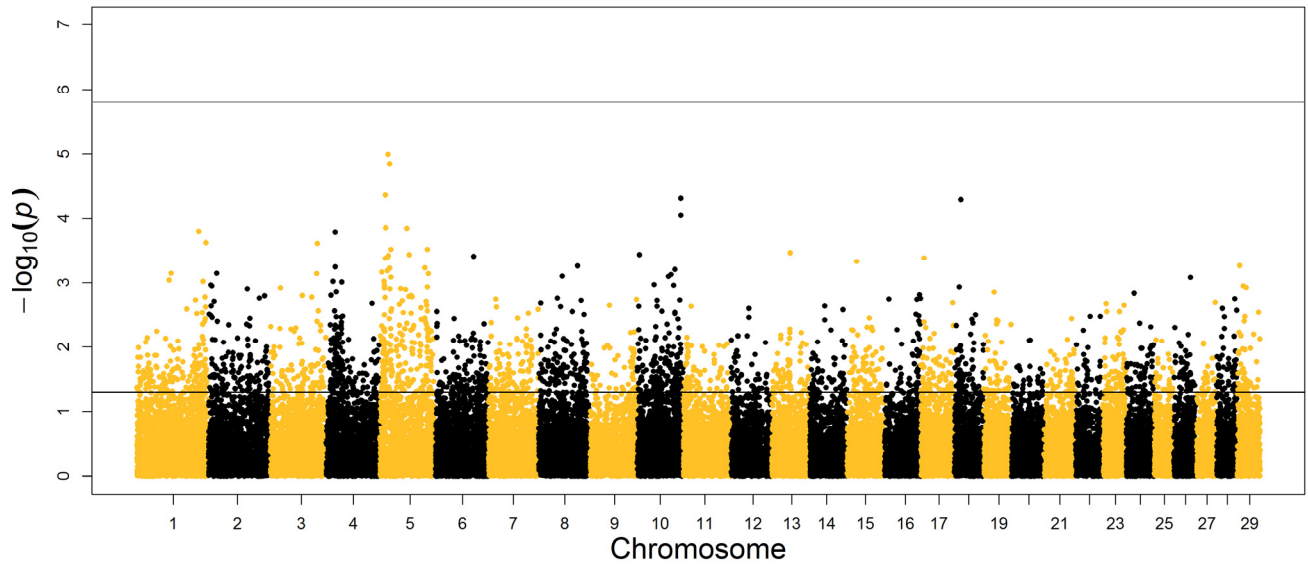

**C - Coat colour dilution (Dilu) MM**

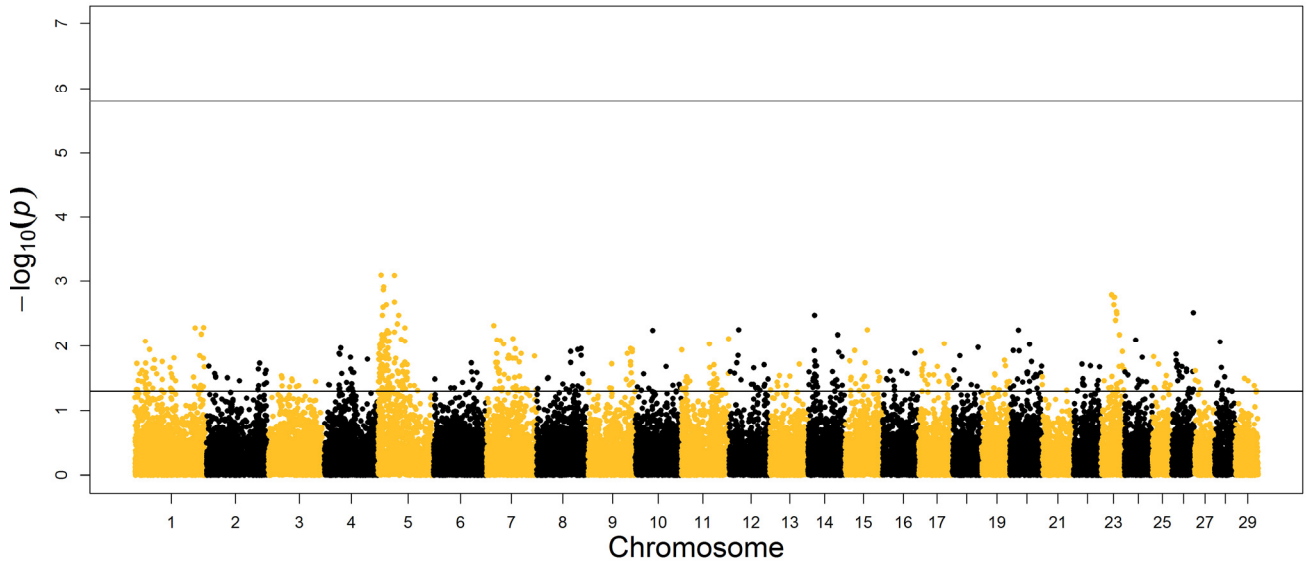

**D - Coat colour dilution (Dilu) CC**

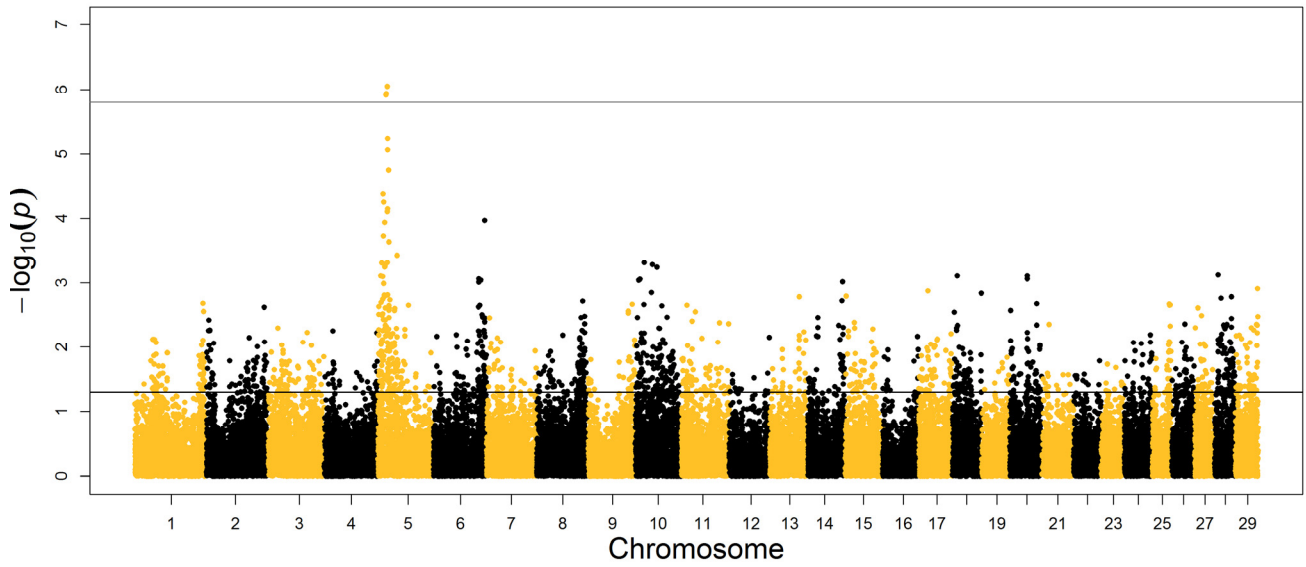

**E - Hair length variation (HLV) MM**

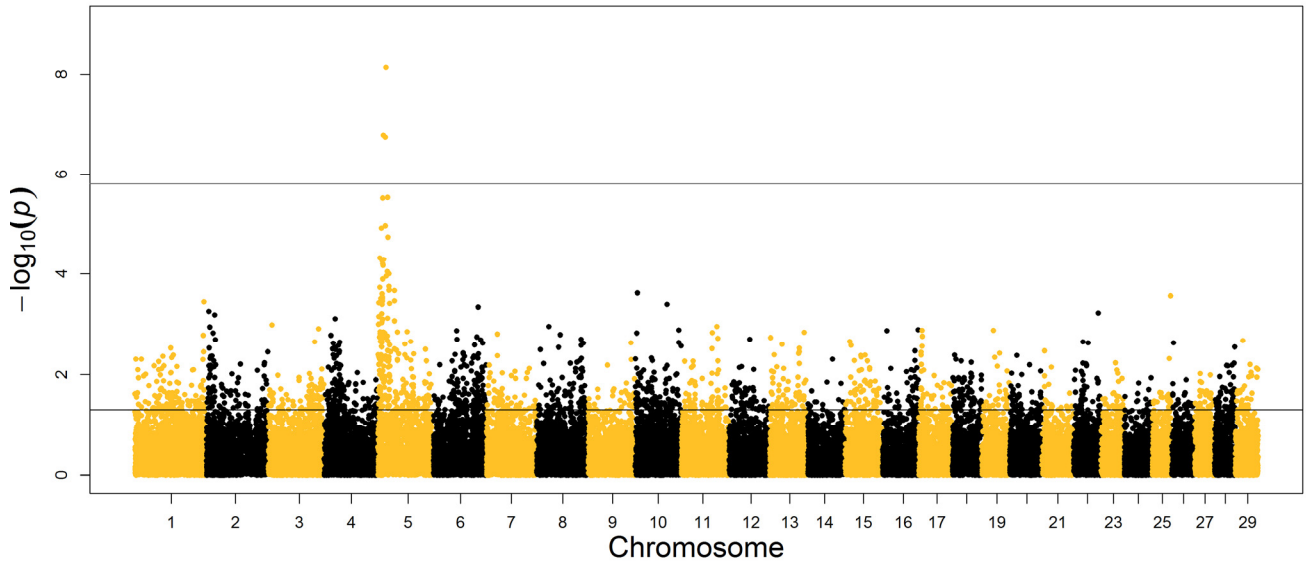

**F - Hair length variation (HLV) CC**

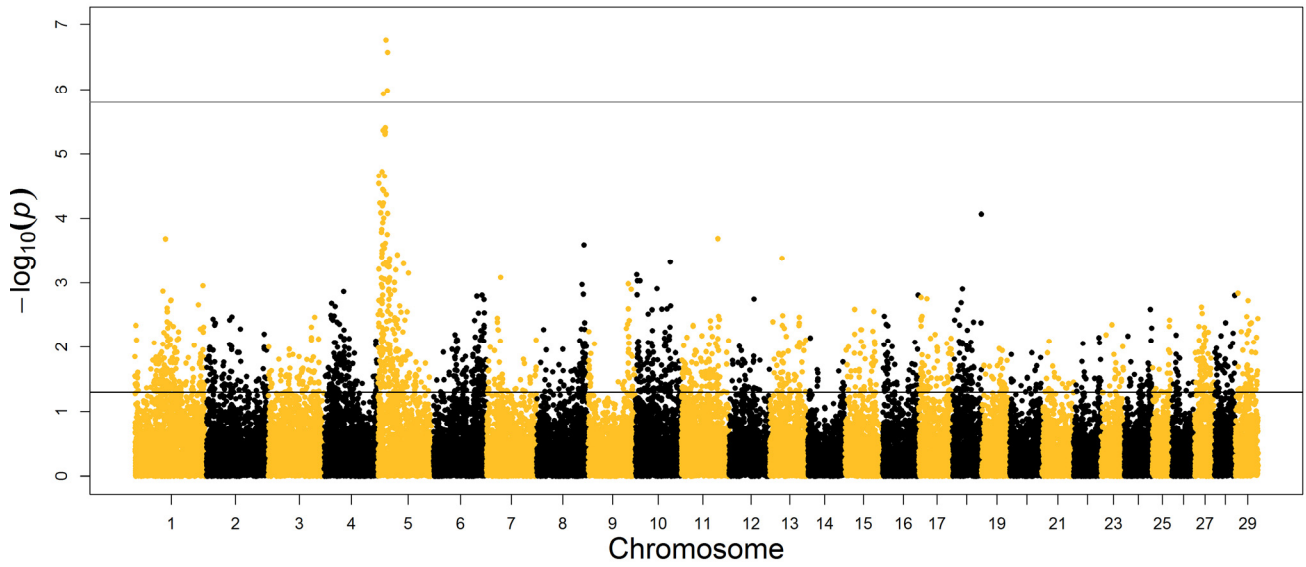

Supplement: 12711_2016_199_MOESM5_ESM.pdf [file 12711_2016_199_MOESM5_ESM.pdf]
