# Supplementary material for: Epistatic interactions between at least three loci determine the “rat-tail” phenotype in cattle
Source: PubMed Central journal article supplement (PMC4818457; doi:10.1186/s12711-016-0199-8), 2016-03-31
Supplement: 12711_2016_199_MOESM6_ESM.pdf [file 12711_2016_199_MOESM6_ESM.pdf]

| Group              | Individual | Allele1 | Allele2 |
|--------------------|------------|---------|---------|
| F <sub>2</sub> _RT | 30105      | 1       | 2       |
| F <sub>2</sub> _RT | 40120      | 2       | 2       |
| F <sub>2</sub> _RT | 20410      | 2       | 2       |
| F <sub>2</sub> _wt | 30106      | 1       | 2       |
| F <sub>2</sub> _wt | 41804      | 1       | 1       |
| F <sub>2</sub> _wt | 40112      | 1       | 2       |
| F <sub>2</sub> _wt | 71114      | 1       | 2       |
