# Supplementary material for: Epistatic interactions between at least three loci determine the “rat-tail” phenotype in cattle
Source: PubMed Central journal article supplement (PMC4818457; doi:10.1186/s12711-016-0199-8), 2016-03-31
Supplement: 12711_2016_199_MOESM7_ESM.pdf [file 12711_2016_199_MOESM7_ESM.pdf]

**Additional file 6: Tab. S1: Genes in the region 10 - 25 Mb on BTA5 found to be expressed in the pigmented skin transcriptome of RTS-affected and wild type animals**

| Gene       | Name                                                                                           | Position [Mb] <sup>1</sup> | Number of exons <sup>2</sup> |           |                 | Comment                                                 |
|------------|------------------------------------------------------------------------------------------------|----------------------------|------------------------------|-----------|-----------------|---------------------------------------------------------|
|            |                                                                                                |                            | RTS A                        | wild type | RTS B,<br>RTS C |                                                         |
| MYF6       | myogenic factor 6 (herculin)                                                                   | 10,330,470                 | 3                            | 3         | 3               |                                                         |
| LIN7A      | lin-7 homolog A (C. elegans)                                                                   | 10,566,010                 | 6                            | 6         | 6               |                                                         |
| ACSS3      | acyl-CoA synthetase short-chain family member 3                                                | 10,731,243                 | 16                           | 16        | 16              |                                                         |
| CCDC59     | coiled-coil domain containing 59                                                               | 11,378,864                 | 4                            | 4         | 4               |                                                         |
| METTL25    | methyltransferase like 25                                                                      | 12,007,564                 | 9                            | 9         | 9               |                                                         |
| TMTC2      | transmembrane and tetratricopeptide repeat containing 2                                        | 12,290,944                 | 13                           | 13        | 13              |                                                         |
| LOC781108  | PRKR-interacting protein 1 pseudogene                                                          | 13,756,337                 | 1                            | 1         | 1               |                                                         |
| SLC6A15    | solute carrier family 6 (neutral amino acid transporter), member 15                            | 14,572,179                 | 12                           | 12        | 12              |                                                         |
| ALX1       | ALX homeobox 1                                                                                 | 14,991,697                 | 4                            | 4         | 4               |                                                         |
| RASSF9     | Ras association (RalGDS/AF-6) domain family (N-terminal) member 9                              | 15,546,053                 | 2                            | 2         | 2               |                                                         |
| C5H12orf29 | chromosome 5 open reading frame, human C12orf29                                                | 17,892,374                 | 7                            | 7         | 7               |                                                         |
| CEP290     | centrosomal protein 290kDa                                                                     | 17,998,514                 | 55;56                        | 55;56     | 55;56           |                                                         |
| TMTC3      | transmembrane and tetratricopeptide repeat containing 3                                        | 17,998,756                 | 14;13                        | 14;13     | 14;13           |                                                         |
| KITLG      | KIT ligand                                                                                     | 18,420,198                 | 9;8                          | 9;8       | 9;8             | Additional exon 1                                       |
| DUSP6      | dual specificity phosphatase 6                                                                 | 19,280,061                 | 3                            | 3         | 3               |                                                         |
| POC1B      | POC1 centriolar protein B                                                                      | 19,462,615                 | 12*                          | 12;10     | 12              | No RTS-associated splicing                              |
| GALNT4     | UDP-N-acetyl-alpha-D-galactosamine:polypeptide N-acetylgalactosaminyltransferase 4 (GalNAc-T4) | 19,461,415                 | 1                            | 1         | 1               |                                                         |
| ATP2B1     | ATPase, Ca <sup>++</sup> transporting, plasma membrane 1                                       | 19,670,561                 | 21                           | 21        | 21              | 2 transcription start sites, no RTS-associated splicing |

|              |                                                                                          |            |                |                |            |                                                    |
|--------------|------------------------------------------------------------------------------------------|------------|----------------|----------------|------------|----------------------------------------------------|
| KERA         | keratocan                                                                                | 21,003,034 | 3              | 3              | 3          |                                                    |
| LUM          | lumican                                                                                  | 21,047,145 | 4;3            | 4;3            | 4;3        | 2 transcription start sites,<br>additional exon 1  |
| DCN          | decorin                                                                                  | 21,119,087 | 8              | 8              | 8          | 2 transcription start sites                        |
| BTG1         | B-cell translocation gene 1, anti-proliferative                                          | 22,088,782 | 2              | 2              | 2          |                                                    |
| LOC784883    | putative gamma-taxilin-like protein CYorf15B                                             | 22,526,151 | 3              | 3              | 3          |                                                    |
| LOC519417    | pleckstrin homology domain-containing family G member 7                                  | 22,719,202 | 16             | 16             | 16         |                                                    |
| EEA1         | early endosome antigen 1                                                                 | 22,932,444 | 30*;29*;<br>28 | 30*;29*;<br>28 | 30*;29*;28 | 2 previously unknown<br>additional exons           |
| NUDT4        | nudix (nucleoside diphosphate linked moiety X)-type motif 4                              | 23,348,044 | 5              | 5              | 5          |                                                    |
| UBE2N        | ubiquitin carrier protein N ubiquitin-conjugating enzyme E2 N ubiquitin-protein ligase N | 23,411,877 | 4              | 4              | 4          |                                                    |
| MRPL42       | mitochondrial ribosomal protein L42                                                      | 23,426,113 | 7,7*,6         | 7,7*,6         | 7,7*,6     |                                                    |
| SOCS2        | suppressor of cytokine signaling 2                                                       | 23,524,065 | 3              | 3              | 3          |                                                    |
| CRADD        | CASP2 and RIPK1 domain containing adaptor with death domain                              | 23,629,05  | 3              | 3              | 3          | additional exon 3<br>compared to annotation<br>104 |
| PLXNC1       | plexin C1                                                                                | 24,072,234 | 31;30          | 31;30          | 31;30      |                                                    |
| CEP83        | centrosomal protein 83kDa                                                                | 24,374,925 | 17;16          | 17;16          | 17;16      |                                                    |
| LOC100848598 | uncharacterized LOC100848598                                                             | 24,380,708 | 3;2            | 3;2            | 3;2        |                                                    |
| TMCC3        | transmembrane and coiled-coil domain family 3                                            | 24,537,335 | 4              | 4              | 4          |                                                    |
| NDUFA12      | NADH dehydrogenase (ubiquinone) 1 alpha subcomplex, 12                                   | 24,873,028 | 4;3            | 4;3            | 4;3        |                                                    |
| NR2C1        | nuclear receptor subfamily 2, group C, member 1                                          | 24,922,158 | 14             | 14             | 14         |                                                    |
| FGD6         | FYVE, RhoGEF and PH domain containing 6                                                  | 25,031,325 | 21, 20*        | 21             | 21         |                                                    |

<sup>1</sup>First base of exon 1 according to *Bos taurus* genome assembly UMD3.1.1.

<sup>2</sup>Number of exons in pigmented skin of three individuals (RTS A, RTS B, RTS C) with “rat-tail” phenotype and an individual with wild type phenotype.

\*Splice variants compared annotation release 104 of the *Bos taurus* genome assembly
